# Supplementary material
Source: MDPI journal article supplement (https://www.mdpi.com/2072-4292/13/17/3540)
Supplement: s1 [file s1]

## Supplementary materials

**Table S1.** Multidimensional assessment spaces and their properties.

| Type | Definition                                   | Counties                                                                                                                                                                                                                   | Count |
|------|----------------------------------------------|----------------------------------------------------------------------------------------------------------------------------------------------------------------------------------------------------------------------------|-------|
| A    | Counties degraded at five years              | Becker, Cass, Clay, Douglas, Lincoln, Pope, Stevens, Transverse, Yellow Medicine                                                                                                                                           | 9     |
| B    | Counties degraded at four years out of five  | Beltrami, Big Stone, Blue Earth, Brown, Chippewa, Chisago, Freeborn, Grant, Kanabec, Lac qui Parle, Marshall, Mower, Murray, Waseca, Washington                                                                            | 15    |
| C    | Counties degraded at three years out of five | Carver, Clearwater, Dakota, Goodhue, Hubbard, Jackson, Kandiyohi, Koochiching, Le Sueur, Lyon, Mahomen, Martin, Mille Lacs, Morrison, Nicollet, Nobles, Pennington, Polk, Ramsey, Renville, Scott, Stearns, Wadena, Winona | 27    |
| D    | Counties degraded at two years out of five   | Aitkin, Carlton, Faribault, Hennepin, Isanti, Itasca, Kittson, Lake, McLeod, Meeker, Olmsted, Otter Tail, Pine, Redwood, Rice, Roseau, Sherburne, St. Louis, Swift, Todd, Wabasha, Watonwan                                | 22    |
| E    | Counties degraded at one year out of five    | Cook, Cotton Wood, Crow Wing, Sibley, Wright                                                                                                                                                                               | 5     |

**Table S2.** The F test reference table.

| Dimension | $\alpha$ | F-score | $F_{\alpha=0.05}$ | Result   |
|-----------|----------|---------|-------------------|----------|
| P         | 0.05     | 2.8164  | 2.07              | Credible |
| Q         | 0.05     | 8.8826  | 2.07              | Credible |
| D         | 0.05     | 2.2899  | 2.07              | Credible |
